# Supplementary material
Source: PubMed Central journal article supplement (PMC5247495)
Supplement: rspb20162182supp1.pdf [file rspb20162182supp1.pdf]

## Electronic supplementary material

### Methods – DArTseq

Genome-wide single nucleotide polymorphism (SNP) data was generated at Diversity Arrays Technology (DArT). DArTseq™ is genotype-by-sequencing technology which represents a combination of a DArT complexity reduction methods and next generation sequencing platforms. DArTseq methods are optimized for different organisms and applications by selecting the most appropriate complexity reduction method (size of the representation and the fraction of a genome selected for the assays). Four methods of complexity reduction were tested and the PstI-HpaII method was selected. Genomic DNA was processed in digestion/ligation reactions principally as per Kilian *et al.* (2012) but replacing a single PstI-compatible adaptor with two different adaptors corresponding to two different Restriction Enzyme (RE) overhangs. The PstI-compatible adapter was designed to include Illumina flowcell attachment sequence, sequencing primer sequence and “staggered”, varying length barcode region, similar to the sequence reported by Elshire *et al.* (2011). Reverse adapter contained the flowcell attachment region and HpaII-compatible overhang sequence. Sequencing was carried out on a single lane of an Illumina Hiseq2500 and processed using proprietary DArT analytical pipelines. In the primary pipeline, the FASTQ files were first processed to filter away poor quality sequences. In the barcode region the minimum Phred pass score was 30 and the minimum pass was 75%, while in the whole read quality the minimum Phred pass score was 10 and the minimum pass quality was 50%. Approximately 2,500,000 sequences per barcode/sample were identified and used in marker calling. Identical sequences were collapsed into fastqcall files and these files were used in the secondary pipeline for DArT’s proprietary SNP calling algorithms (DArTsoft14). Sequences were blasted against a *Symbiodinium* reference genome to ensure that only sequences belonging to the coral host and not the symbiont were included in the dataset; however, no symbionts were detected among the markers anyway due to the strength of DArT PL’s filtering software. This software (DArTsoft14) has the capacity to filter contaminants such as viral and/or bacterial sequences in SNP marker selection through training the program to distinguish allelic sequence variants from

paralogs and “contaminating” sequences based on analysis of Mendelian behaviour of DArTseq markers in thousands of control crosses in a large diversity of organisms.

DaRTseq generates two types of data: (a) “Silico DaRT” which are presence/absence dominant markers based on a range of DNA variation types such as SNPs, indels and methylation variation; and (b) SNPs in fragments of approximately 100 bp. In this study we used only the fragment data, and SNPs were extracted from each fragment and concatenated into supermatrices using IUPAC codes for heterozygous loci.

### **Methods – Phylogenetic analyses**

For the CR and *PaxC*, the most appropriate model of DNA substitution was determined in MEGA6 (Tamura *et al.* 2013) using the Bayesian Information Criterion (CR = HKY model, *PaxC* = K80), and these models were used in phylogenetic analyses run in PhyML 3.0 (Guindon *et al.* 2010). Support for each node was based upon 1000 bootstrap replicates. For the Bayesian analyses, MCMC chains were run for 3,000,000 generations (for each gene/SNP matrix) and sampled every 100<sup>th</sup> generation, with the first 7,500 runs discarded as burn-in. The *PaxC* alignment contained 14 indels (including several large indels up to 390 bp), and the CR contained three large indels, and many of the indels were phylogenetically informative. To take a conservative approach, each indel was coded as a single base change, based on the view that indels arise from single mutation events (Simmons & Ochoterena 2000).

### **ESM References**

- Elshire RJ, Glaubitz JC, Sun Q, Poland JA, Kawamoto K, Buckler ES, Mitchell SE 2011. A Robust, Simple Genotyping-by-Sequencing (GBS) Approach for High Diversity Species. *PLoS One*, **6** 19379-10.1371/journal.pone.0019379.
- Kilian A, Wenz IP, Huttner E, Carling J, Xia L, *et al.*. 2012 Diversity Arrays Technology (DArT) - a generic genome profiling technology on open platforms. *Methods in Molecular Biology* Edited by Francois Pompanon and Aurelie Bonin, Humana Press: 67–91
- Tamura K, Stecher G, Peterson D, Filipinski A, Kumar S 2013 MEGA6: Molecular Evolutionary Genetics Analysis version 6.0. . *Mol Biol Evol* **30**, 2725-2729.
- Guindon S., Dufayard J.F., Lefort V., Anisimova M., Hordijk W., Gascuel O. 2010 New algorithms and methods to estimate maximum-likelihood phylogenies: assessing the performance of PhyML 3.0. *Syst Biol* **59**(3), 307-321.
- Simmons MP, Ochoterena H (2000) Gaps as characters in sequence based phylogenetic analyses. *Syst Biol* **49**, 369-381

**Table S1.** Locality and GPS co-ordinates of sites from which each sample was collected in this study. Species are arranged into morphological species groups as traditionally defined by Wallace (1999). Clade number and letter refers to the clades highlighted in Fig S1. Registration numbers are for the Western Australian Museum where samples are housed. Samples annotated with \_A = autumn spawner and \_S = spring spawner. \* = sample couldn't be amplified in CR; ^ = sample couldn't be amplified in *PaxC*; # = sample not included in SNP analysis.

| Species group       | Species               | Sample | Clade      | Region     | Lat      | Long      | Reg. No. |
|---------------------|-----------------------|--------|------------|------------|----------|-----------|----------|
| aspera              | <i>A. aspera</i>      | asp1   | IIID       | Kimberley  | S15.505  | E123.608  | Z65722   |
|                     | <i>A. aspera</i>      | asp2   | IVA        | Kimberley  | S16.054  | E123.350  | Z65735   |
|                     | <i>A. aspera</i>      | asp3   | IVA        | Abrolhos   | S28.681  | E113.860  |          |
|                     | <i>A. millepora_A</i> | mil1   | IIIA       | Ningaloo   | S22.168  | E113.865  |          |
|                     | <i>A. millepora_A</i> | mil2   | IIIA       | Ningaloo   | S22.168  | E113.865  |          |
|                     | <i>A. millepora_A</i> | mil3#  | -          | Ningaloo   | S22.168  | E113.865  |          |
|                     | <i>A. millepora_A</i> | mil4#  | -          | Ningaloo   | S22.168  | E113.865  |          |
|                     | <i>A. millepora_S</i> | mil5   | IIIA       | Ashmore    | S12.245  | E122.986  |          |
|                     | <i>A. millepora_S</i> | mil6   | IIIA       | Ashmore    | S12.245  | E122.986  |          |
|                     | <i>A. millepora_S</i> | mil7#  | -          | Ashmore    | S12.245  | E122.986  |          |
|                     | <i>A. millepora_S</i> | mil8#  | -          | Ashmore    | S12.245  | E122.986  |          |
|                     | <i>A. pulchra</i>     | pul1   | IIIC       | Kimberley  | S13.956  | E125.623  | Z65654   |
|                     | <i>A. pulchra</i>     | pul2*^ | IIIA       | Kimberley  | S15.551  | E124.177  | Z65621   |
|                     | <i>A. pulchra</i>     | pul3   | IIID       | Kimberley  | S13.956  | E125.623  | Z65683   |
|                     | <i>A. spicifera</i>   | spi1   | IIIB       | Kimberley  | S15.324  | E123.076  | Z65612   |
|                     | <i>A. spicifera</i>   | spi2   | IIIB       | Abrolhos   | S 28.852 | E114.0122 |          |
| <i>A. spicifera</i> | spi3                  | IIIB   | Montebello | S20.516    | E115.466 |           |          |
| divaricata          | <i>A. divaricata</i>  | div1   | IIIE       | Kimberley  | S13.956  | E125.623  | Z65637   |
|                     | <i>A. divaricata</i>  | div2   | IIIC       | Kimberley  | S15.324  | E123.076  | Z65609   |
|                     | <i>A. divaricata</i>  | div3   | IIIE       | Kimberley  | S13.956  | E125.623  | Z65673   |
|                     | <i>A. stoddarti</i>   | sto1*^ | IIIA       | Kimberley  | S15.324  | E123.076  | Z65616   |
|                     | <i>A. stoddarti</i>   | sto2   | IIIE       | Kimberley  | S13.956  | E125.623  | Z65677   |
|                     | <i>A. stoddarti</i>   | sto3   | IIIE       | Kimberley  | S13.856  | E125.824  | Z65706   |
| florida             | <i>A. florida</i>     | flo1   | IVC        | Kimberley  | S14.061  | E125.366  | Z65765   |
|                     | <i>A. florida</i>     | flo2   | IV         | Kimberley  | S12.237  | E123.160  | Z66287   |
|                     | <i>A. florida</i>     | flo3   | IV         | Kimberley  | S15.038  | E124.427  | Z65712   |
| humilis             | <i>A. digitifera</i>  | dig1   | IIID       | Kimberley  | S15.282  | E124.105  | Z65717a  |
|                     | <i>A. digitifera</i>  | dig2   | IIID       | Kimberley  | S15.282  | E124.105  | Z65717b  |
|                     | <i>A. digitifera</i>  | dig3   | IVB        | Kimberley  | S13.956  | E125.623  | Z65671   |
|                     | <i>A. gemmifera</i>   | gem1   | IVC        | Kimberley  | S14.117  | E123.538  | Z65750   |
|                     | <i>A. gemmifera</i>   | gem2   | IVA        | Kimberley  | S14.117  | E123.538  | Z65756   |
|                     | <i>A. humilis</i>     | hum1   | IVB        | Montebello | S20.405  | E115.581  |          |

---

|            |                       |        |      |            |          |          |        |
|------------|-----------------------|--------|------|------------|----------|----------|--------|
|            | <i>A. humilis</i>     | hum2*^ | IVB  | Kimberley  | S14.117  | E123.538 | Z65748 |
|            | <i>A. humilis</i>     | hum3   | IVB  | Montebello | S20.907  | E115.462 |        |
|            | <i>A. samoensis_S</i> | sam1   | IVB  | Barrow     | S20.786  | E115.506 |        |
|            | <i>A. samoensis_S</i> | sam2   | IVB  | Barrow     | S20.786  | E115.506 |        |
|            | <i>A. samoensis_S</i> | sam3   | IVB  | Barrow     | S20.786  | E115.506 | Z84440 |
|            | <i>A. samoensis_S</i> | sam4   | IVB  | Barrow     | S20.786  | E115.506 | Z84441 |
|            | <i>A. samoensis_S</i> | sam5   | IVB  | Barrow     | S20.786  | E115.506 | Z84442 |
|            | <i>A. samoensis_S</i> | sam6   | IVB  | Barrow     | S20.786  | E115.506 | Z84443 |
|            | <i>A. samoensis_S</i> | sam7   | IVB  | Barrow     | S20.786  | E115.506 | Z84446 |
|            | <i>A. samoensis_S</i> | sam8   | IVB  | Barrow     | S20.786  | E115.506 | Z84447 |
|            | <i>A. samoensis_A</i> | sam9   | IVC  | Barrow     | S20.786  | E115.506 | Z84451 |
|            | <i>A. samoensis_A</i> | sam10  | IVC  | Barrow     | S20.786  | E115.506 |        |
|            | <i>A. samoensis_A</i> | sam11  | IVC  | Barrow     | S20.786  | E115.506 | Z84461 |
|            | <i>A. samoensis_A</i> | sam12  | IVC  | Barrow     | S20.786  | E115.506 | Z84452 |
|            | <i>A. samoensis_A</i> | sam13  | IVC  | Barrow     | S20.786  | E115.506 | Z84463 |
|            | <i>A. samoensis_A</i> | sam14  | IVC  | Barrow     | S20.786  | E115.506 | Z84453 |
|            | <i>A. samoensis_A</i> | sam15  | IVC  | Barrow     | S20.786  | E115.506 | Z84454 |
|            | <i>A. samoensis_A</i> | sam16  | IVC  | Barrow     | S20.786  | E115.506 | Z84455 |
| hyacinthus | <i>A. cytherea</i>    | cyt1   | IIIB | Kimberley  | S13.956  | E125.623 | Z65641 |
|            | <i>A. cytherea</i>    | cyt2   | IIIB | Kimberley  | S14.117  | E123.538 | Z65792 |
|            | <i>A. cytherea</i>    | cyt3   | IIIB | Montebello | S20.786  | E115.506 |        |
| latistella | <i>A. subulata</i>    | sub1   | IIIB | Kimberley  | S13.956  | E125.623 | Z65682 |
|            | <i>A. subulata</i>    | sub2   | IIIA | Kimberley  | S16.054  | E123.350 | Z65738 |
|            | <i>A. subulata</i>    | sub3   | IIIA | Kimberley  | S13.856  | E125.824 | Z65700 |
| muricata   | <i>A. muricata</i>    | mur1   | IIIC | Kimberley  | S13.956  | E125.623 | Z65648 |
|            | <i>A. muricata</i>    | mur2   | IIIE | Kimberley  | S14.254  | E125.159 | Z65775 |
|            | <i>A. muricata</i>    | mur3   | IIID | Kimberley  | S13.956  | E125.623 | Z65684 |
| nasuta     | <i>A. lutkeni</i>     | lut1   | IIID | Kimberley  | S13.956  | E125.623 | Z65647 |
|            | <i>A. lutkeni</i>     | lut2   | IVA  | Kimberley  | S13.956  | E125.623 | Z65649 |
|            | <i>A. lutkeni</i>     | lut3*^ | IVA  | Kimberley  | S15.525  | E124.177 | Z65624 |
| selago     | <i>A. donei</i>       | don1   | IIIB | Kimberley  | S13.956  | E125.623 | Z65636 |
|            | <i>A. donei</i>       | don2   | IE   | Kimberley  | S13.856  | E125.824 | Z65697 |
|            | <i>A. donei</i>       | don3   | IIIB | Kimberley  | S14.117  | E123.538 | Z65759 |
|            | <i>A. loisetteae</i>  | los1*  | IIIA | Abrolhos   | S 28.852 | E114.012 |        |
|            | <i>A. loisetteae</i>  | los2   | IIIA | Abrolhos   | S28.681  | E113.860 |        |
|            | <i>A. loisetteae</i>  | los3   | IIIA | Abrolhos   | S28.681  | E113.860 |        |
|            | <i>A. tenuis_A</i>    | ten1   | IC   | Montebello | S20.516  | E115.466 |        |
|            | <i>A. tenuis_A</i>    | ten2   | IA   | Montebello | S20.516  | E115.466 |        |

---

---

|         |                      |        |     |            |          |          |        |
|---------|----------------------|--------|-----|------------|----------|----------|--------|
|         | <i>A. tenuis_A</i>   | ten3   | IA  | Montebello | S20.516  | E115.466 |        |
|         | <i>A. tenuis_A</i>   | ten4   | IC  | Montebello | S20.516  | E115.466 |        |
|         | <i>A. tenuis_A</i>   | ten5   | IB  | Kimberley  | S13.956  | E125.623 | Z65663 |
|         | <i>A. tenuis_A</i>   | ten6   | IB  | Kimberley  | S13.856  | E125.824 | Z65695 |
|         | <i>A. tenuis_S</i>   | ten7   | IE  | Kimberley  | S13.956  | E125.623 | Z65667 |
|         | <i>A. tenuis_S</i>   | ten8   | IE  | Kimberley  | S13.956  | E125.623 | Z65655 |
|         | <i>A. tenuis_A</i>   | ten9   | IC  | Montebello | S20.516  | E115.466 |        |
|         | <i>A. tenuis_S</i>   | ten10  | IA  | Ashmore    | S12.240  | E122.980 |        |
|         | <i>A. tenuis_S</i>   | ten11  | IA  | Ashmore    | S12.240  | E122.980 |        |
|         | <i>A. tenuis_S</i>   | ten12  | IC  | Ashmore    | S12.240  | E122.980 |        |
|         | <i>A. tenuis_S</i>   | ten13  | IC  | Ashmore    | S12.240  | E122.980 |        |
|         | <i>A. tenuis_A</i>   | ten14  | IC  | Ashmore    | S12.184  | E123.109 |        |
|         | <i>A. tenuis_S</i>   | ten15  | IC  | Ashmore    | S12.240  | E122.980 |        |
|         | <i>A. tenuis_S</i>   | ten16  | IC  | Ashmore    | S12.240  | E122.980 |        |
|         | <i>A. selago</i>     | sel1   | ID  | Kimberley  | S13.956  | E125.623 | Z65665 |
|         | <i>A. selago</i>     | sel2   | ID  | Kimberley  | S13.856  | E125.824 | Z65698 |
|         | <i>A. selago</i>     | sel3   | IC  | Montebello | S21.044  | E115.470 |        |
| robusta | <i>A. intermedia</i> | int1   | IVA | Kimberley  | S13.956  | E125.623 | Z65689 |
|         | <i>A. intermedia</i> | int2*^ | IVA | Abrolhos   | S 28.852 | E114.012 |        |
|         | <i>A. intermedia</i> | int3   | IVA | Abrolhos   | S 28.852 | E114.012 |        |

---

**Table S2.** Descriptive statistics of DArT single nucleotide polymorphism dataset for each *Acropora* species sampled ( $\pm$  SE).

| <b>Species</b>       | <b>N</b> | <b>Freq.<br/>heterozygotes</b> | <b>Freq.<br/>homozygote ref.</b> | <b>Freq.<br/>missing data</b> | <b>Freq.<br/>polymorphic loci</b> |
|----------------------|----------|--------------------------------|----------------------------------|-------------------------------|-----------------------------------|
| <i>A. aspera</i>     | 3        | 0.028                          | 0.736                            | 0.160                         | 0.182                             |
| <i>A. cytherea</i>   | 3        | 0.040                          | 0.719                            | 0.172                         | 0.138                             |
| <i>A. digitifera</i> | 3        | 0.037                          | 0.731                            | 0.118                         | 0.163                             |
| <i>A. divaricata</i> | 3        | 0.048                          | 0.702                            | 0.206                         | 0.169                             |
| <i>A. donei</i>      | 3        | 0.036                          | 0.721                            | 0.171                         | 0.155                             |
| <i>A. florida</i>    | 3        | 0.077                          | 0.702                            | 0.060                         | 0.203                             |
| <i>A. gemmifera</i>  | 2        | 0.052                          | 0.729                            | 0.127                         | 0.078                             |
| <i>A. humilis</i>    | 3        | 0.075                          | 0.709                            | 0.041                         | 0.150                             |
| <i>A. intermedia</i> | 3        | 0.047                          | 0.719                            | 0.094                         | 0.134                             |
| <i>A. loisetteae</i> | 3        | 0.026                          | 0.735                            | 0.151                         | 0.078                             |
| <i>A. lutkeni</i>    | 3        | 0.023                          | 0.732                            | 0.166                         | 0.166                             |
| <i>A. millepora</i>  | 4        | 0.044                          | 0.725                            | 0.104                         | 0.115                             |
| <i>A. muricata</i>   | 3        | 0.020                          | 0.727                            | 0.211                         | 0.180                             |
| <i>A. pulchra</i>    | 3        | 0.025                          | 0.734                            | 0.187                         | 0.226                             |
| <i>A. samoensis</i>  | 16       | 0.049                          | 0.716                            | 0.088                         | 0.226                             |
| <i>A. selago</i>     | 3        | 0.024                          | 0.711                            | 0.378                         | 0.226                             |
| <i>A. spicifera</i>  | 3        | 0.029                          | 0.723                            | 0.150                         | 0.226                             |
| <i>A. stoddarti</i>  | 3        | 0.100                          | 0.681                            | 0.071                         | 0.226                             |
| <i>A. subulata</i>   | 3        | 0.042                          | 0.720                            | 0.128                         | 0.226                             |
| <i>A. tenuis</i>     | 16       | 0.045                          | 0.694                            | 0.387                         | 0.226                             |
| <b>Min</b>           |          | 0.020                          | 0.681                            | 0.041                         | 0.078                             |
| <b>Max</b>           |          | 0.100                          | 0.736                            | 0.387                         | 0.226                             |
| <b>Mean</b>          |          | 0.046 ( $\pm$ 0.006)           | 0.716 ( $\pm$ 0.004)             | 0.160 ( $\pm$ 0.019)          | 0.179 ( $\pm$ 0.010)              |

**Table S3.** Comparison of trees showing the placement of species within major clades (clades I, III or IV) and the placement of individuals within species (tight or split; MS = major split between clades; ms = minor split within a clade), and where discrepancies in topologies occurred. The criteria for a discrepancy is where there is support for different topologies on the two trees, but does not apply where one tree is more highly resolved than another.

| Species              | <i>PaxC</i>           | CR                    | SNPs                  | Discrepancy in topology    |
|----------------------|-----------------------|-----------------------|-----------------------|----------------------------|
| <i>A. aspera</i>     | III+IV: split = MS+ms | III+IV: split = MS+ms | III+IV: split = MS+ms | -                          |
| <i>A. cytherea</i>   | III: tight            | IV: tight             | III: tight            | CR ≠ SNP; <i>PaxC</i> ≠ CR |
| <i>A. digitifera</i> | III+IV: split = MS    | III+IV: split = MS    | III+IV: split = MS    | -                          |
| <i>A. divaricata</i> | III: split = ms       | III: split = MS       | III: split = ms       | CR ≠ SNP; <i>PaxC</i> ≠ CR |
| <i>A. donei</i>      | I+III: split = MS     | I+II+IV: split = MS   | I+III: split = MS     | CR ≠ SNP; <i>PaxC</i> ≠ CR |
| <i>A. florida</i>    | IV: split = ms        | IV: tight             | IV: split = ms        | -                          |
| <i>A. gemmifera</i>  | IV: split = ms        | IV: tight             | IV: split = ms        | -                          |
| <i>A. humilis</i>    | IV: tight             | IV: tight             | IV: tight             | -                          |
| <i>A. intermedia</i> | IV: tight             | IV: tight             | IV: tight             | -                          |
| <i>A. loisetteae</i> | III: tight            | III: tight            | III: tight            | -                          |
| <i>A. lutkeni</i>    | III+IV: split = MS    | III+IV: split = MS    | III+IV: split = MS    | -                          |
| <i>A. millepora</i>  | III: split = ms       | III: tight            | III: tight            | <i>PaxC</i> ≠ SNP          |
| <i>A. muricata</i>   | III: split = ms       | III+IV: split = MS    | III: split = ms       | CR ≠ SNP; <i>PaxC</i> ≠ CR |
| <i>A. pulchra</i>    | III: tight            | III+IV: split = MS    | III: tight            | CR ≠ SNP; <i>PaxC</i> ≠ CR |
| <i>A. samoensis</i>  | IV: split = ms        | IV: tight             | IV: split = ms        | -                          |
| <i>A. selago</i>     | I: split = ms         | I: tight              | I: split = ms         | <i>PaxC</i> ≠ SNP          |
| <i>A. spicifera</i>  | III: tight            | III+IV: split = MS    | III: split = ms       | CR ≠ SNP; <i>PaxC</i> ≠ CR |
| <i>A. stoddarti</i>  | III: tight            | III: tight            | III: split = ms       | -                          |
| <i>A. subulata</i>   | III: split = ms       | III+IV: split = MS    | III: split = ms       | CR ≠ SNP; <i>PaxC</i> ≠ CR |
| <i>A. tenuis</i>     | I: split = ms         | I: tight              | I: split = ms         | <i>PaxC</i> ≠ SNP          |

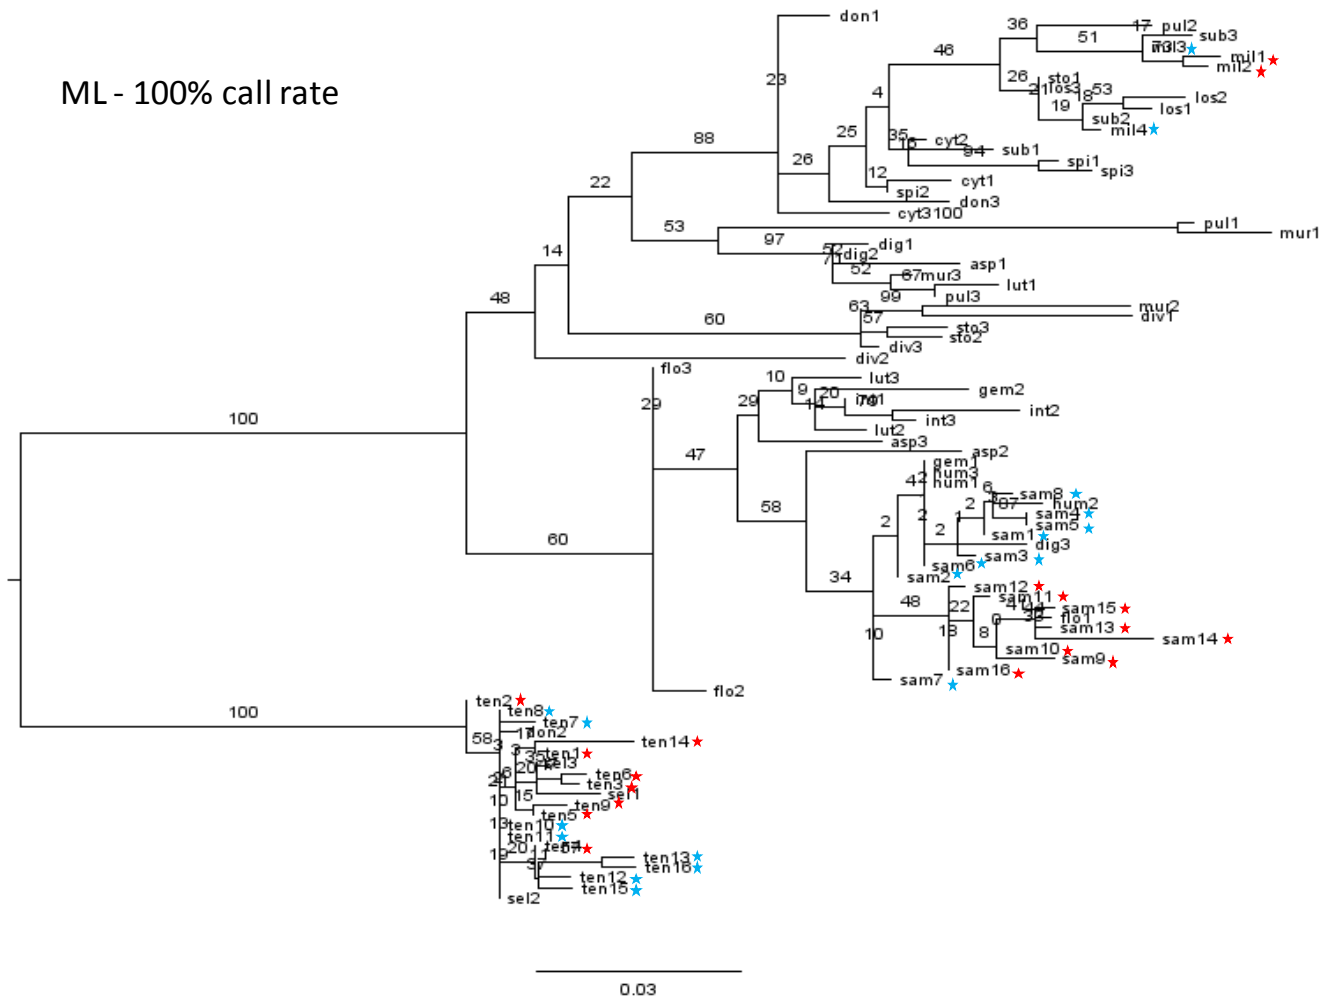

**Figure S1(a).** Maximum Likelihood trees generated in RAxML from SNP matrices with genotype call rate of (a) 100% (b) 90% and (c) 70% and a minimum coverage of 8X. Blue stars represent spring spawners and red stars represent autumn spawners.



ML - 90% call rate

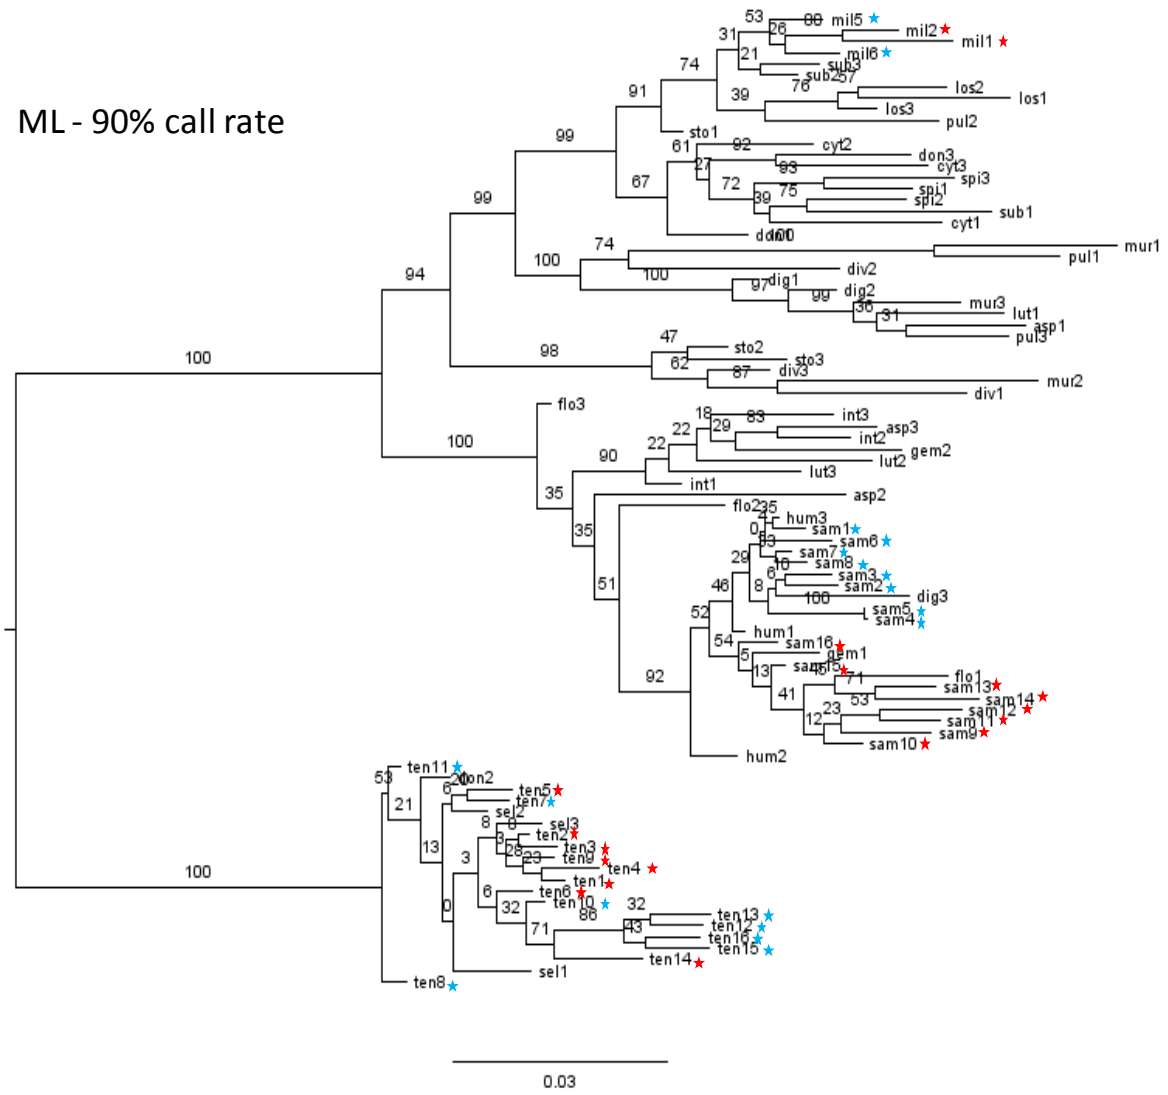

Figure S1(b). continued

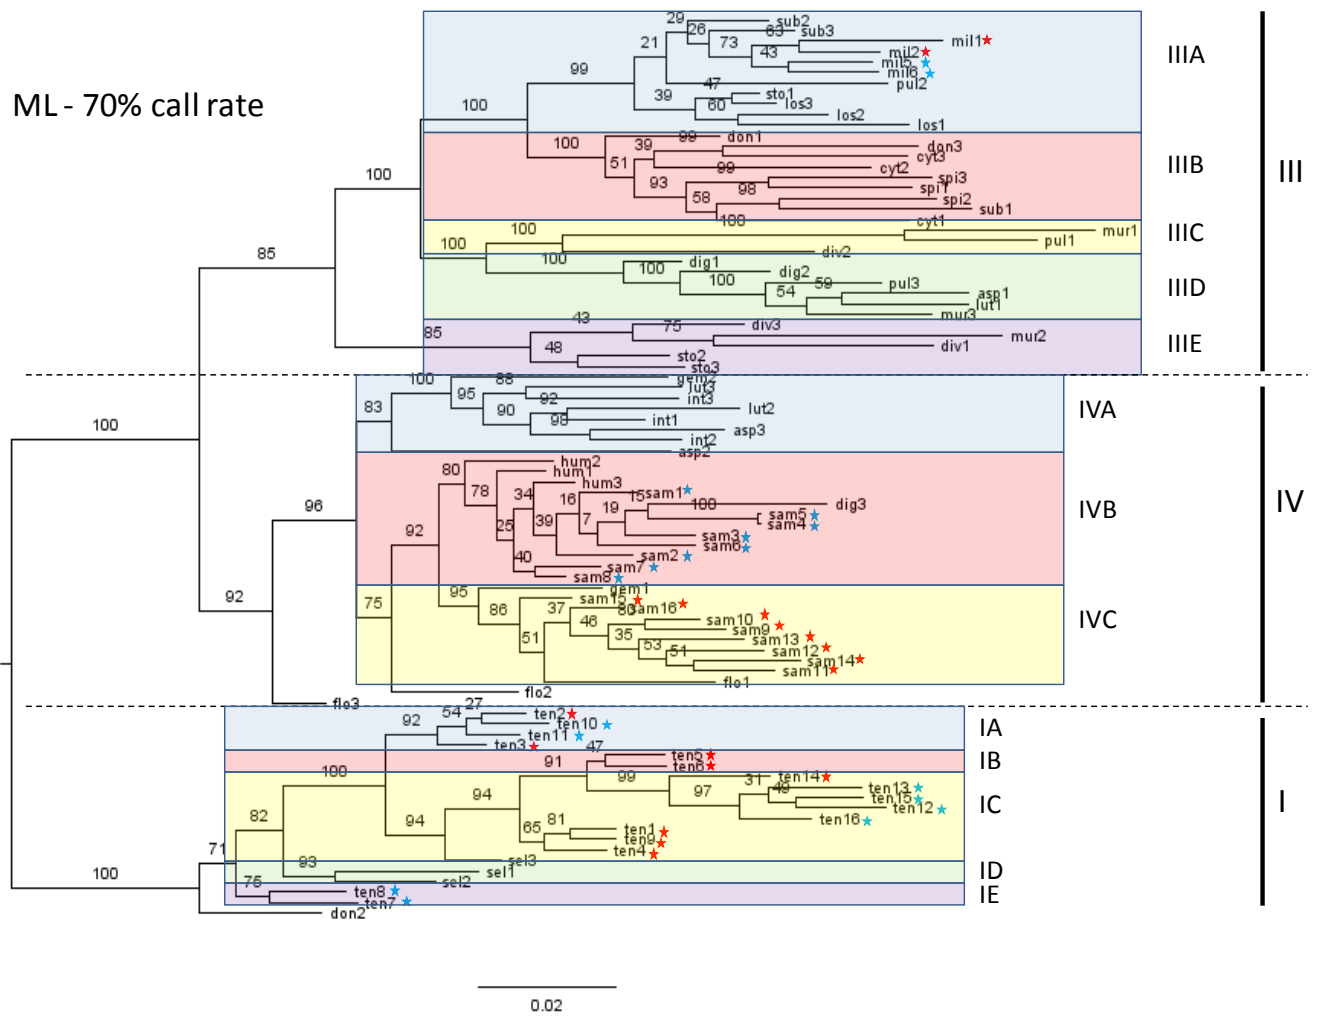

Figure S1(c). continued

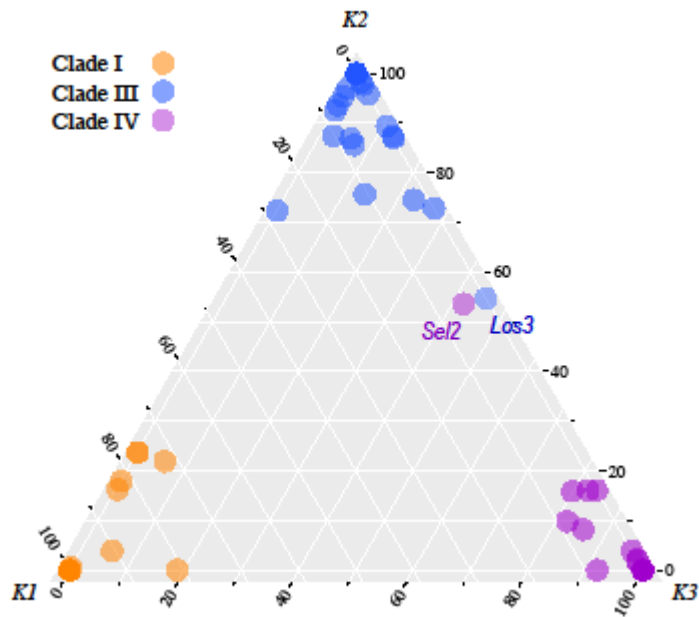

**Figure S2.** Admixture plot from analyses run in ADMIXTURE showing three genetic clusters that correspond to the three phylogenetic clades. The two individuals with >25% admixture were *selago2* (purple) and *loissettae3* (blue).
